RESEARCH ARTICLE

# Hydrogen Peroxide-Resistant CotA and YjqC of *Bacillus altitudinis* Spores Are a Promising Biocatalyst for Catalyzing Reduction of Sinapic Acid and Sinapine in Rapeseed Meal

Yanzhou Zhang<sup>1</sup>, Xunhang Li<sup>1,2</sup>, Zhikui Hao<sup>3</sup>, Ruchun Xi<sup>4</sup>, Yujie Cai<sup>1</sup>, Xiangru Liao<sup>1\*</sup>

**1** The Key Laboratory of Industrial Biotechnology, Ministry of Education, School of Biotechnology, Jiangnan University, 1800 Lihu Avenue, Wuxi, 214122, China, **2** The Bioscience and Engineering College, Jiangxi Agriculture University, Nanchang, 330045, China, **3** Institute of Applied Biotechnology, Taizhou Vocational & Technical College, Taizhou, 318000, China, **4** College of Forestry, South China Agricultural University, Guangdong Key Laboratory for Innovative Development and Utilization of Forest Plant Germplasm, Guangzhou, 510642, China

\* [Microfer@126.com](mailto:Microfer@126.com)

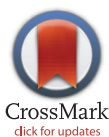

OPEN ACCESS

**Citation:** Zhang Y, Li X, Hao Z, Xi R, Cai Y, Liao X (2016) Hydrogen Peroxide-Resistant CotA and YjqC of *Bacillus altitudinis* Spores Are a Promising Biocatalyst for Catalyzing Reduction of Sinapic Acid and Sinapine in Rapeseed Meal. PLoS ONE 11(6): e0158351. doi:10.1371/journal.pone.0158351

**Editor:** Adam Driks, Loyola University Chicago, UNITED STATES

**Received:** September 20, 2015

**Accepted:** June 14, 2016

**Published:** June 30, 2016

**Copyright:** © 2016 Zhang et al. This is an open access article distributed under the terms of the [Creative Commons Attribution License](https://creativecommons.org/licenses/by/4.0/), which permits unrestricted use, distribution, and reproduction in any medium, provided the original author and source are credited.

**Data Availability Statement:** All relevant data are within the paper and its Supporting Information files.

**Funding:** This work was supported by the Fundamental Research Funds for the Central Universities. The research was funded by Collaborative Innovation Involving Production, Teaching & Research funds of Jiangsu Province (BY2014023-28) and Agricultural Support Project, Wuxi Science & Technology Development (CLE01N1310). This work was also financially supported by the Program of Marine Biological Resources Exploitation and Utilization of Science and

## Abstract

For the more efficient detoxification of phenolic compounds, a promising avenue would be to develop a multi-enzyme biocatalyst comprising peroxidase, laccase and other oxidases. However, the development of this multi-enzyme biocatalyst is limited by the vulnerability of fungal laccases and peroxidases to hydrogen peroxide (H<sub>2</sub>O<sub>2</sub>)-induced inactivation. Therefore, H<sub>2</sub>O<sub>2</sub>-resistant peroxidase and laccase should be exploited. In this study, H<sub>2</sub>O<sub>2</sub>-stable CotA and YjqC were isolated from the outer coat of *Bacillus altitudinis* SYBC hb4 spores. In addition to the thermal and alkali stability of catalytic activity, CotA also exhibited a much higher H<sub>2</sub>O<sub>2</sub> tolerance than fungal laccases from *Trametes versicolor* and *Trametes troglia*. YjqC is a sporulation-related manganese (Mn) catalase with striking peroxidase activity for sinapic acid (SA) and sinapine (SNP). In contrast to the typical heme-containing peroxidases, the peroxidase activity of YjqC was also highly resistant to inhibition by H<sub>2</sub>O<sub>2</sub> and heat. CotA could also catalyze the oxidation of SA and SNP. CotA had a much higher affinity for SA than *B. subtilis* CotA. CotA and YjqC rendered from *B. altitudinis* spores had promising laccase and peroxidase activities for SA and SNP. Specifically, the *B. altitudinis* spores could be regarded as a multi-enzyme biocatalyst composed of CotA and YjqC. The *B. altitudinis* spores were efficient for catalyzing the degradation of SA and SNP in rapeseed meal. Moreover, efficiency of the spore-catalyzed degradation of SA and SNP was greatly improved by the presence of 15 mM H<sub>2</sub>O<sub>2</sub>. This effect was largely attributed to synergistic biocatalysis of the H<sub>2</sub>O<sub>2</sub>-resistant CotA and YjqC toward SA and SNP.

Technology Innovation Team of Taizhou  
(No.1302ky08).

**Competing Interests:** The authors have declared that no competing interests exist.

## Introduction

Peroxidase and laccase have are two of the most promising oxidoreductase enzymes largely because they can catalyze the oxidation of a broad range of phenolic compounds [1]. They have been widely used for several applications, such as the degradation of aromatic pollutants, pulp delignification, lignin bioprocessing, bleaching, biosensors and biofuel cells [2, 3]. In these applications, most of the enzymatic processes were based on a single-enzyme catalysis of laccase or peroxidase. To better accommodate variable environments or diverse substrates, recent studies have revealed that a promising avenue would to develop a multi-enzyme biocatalyst comprising peroxidase, laccase and other enzymes (e.g., glucose oxidase) [4, 5]. Unfortunately, these studies did not examine the effects of hydrogen peroxide ( $H_2O_2$ ) on laccase and peroxidase. Generally, peroxidases require  $H_2O_2$  as a co-substrate to catalyze the oxidation of phenolic compounds, yet peroxidases are highly vulnerable to  $H_2O_2$  [3]. Although laccase uses molecular oxygen rather than  $H_2O_2$  as an electron acceptor, its activity can be reversibly inhibited by  $H_2O_2$  under specific conditions. For example,  $H_2O_2$  produced by glucose oxidase inhibited catalytic or bioelectrocatalytic performance of laccase in enzymatic fuel cells [6–8]. The inhibition of laccase or peroxidase by  $H_2O_2$  has attracted more general interest in industrially relevant applications [3, 7]. Therefore, the  $H_2O_2$ -resistant peroxidase and laccase may be more useful for developing a multi-enzyme biocatalyst.

Recently, bacterial laccases have been recommended as a promising alternative for fungal laccases due to their high thermal stability and high alkaline tolerance [9]. The outstanding representatives of bacterial laccases are thermo- and alkali-stable CotA laccases from *Bacillus subtilis* and other *Bacillus* species [2, 10, 11]. The CotA protein is located in the outer spore coat and contributes to protecting spores from UV light,  $H_2O_2$  and other chemical agents. Thus, the CotA laccase is supposed to be more resistant to  $H_2O_2$  or high salinity than fungal laccases [10, 12]. Compared with the extensive use of heat-, alkali- and halide-resistant CotA laccases, little attention has been focused on *Bacillus* CotA laccases with high resistance to  $H_2O_2$  [12].

In addition to the protein CotA, there is evidence that the spore coat protein of sporulation-related manganese (Mn) catalase (YjqC) grants *B. pumilus* SAFR-032 spores a unique resistance to  $H_2O_2$  [13]. However, the enzymatic properties of YjqC have yet to be explored. Recent research suggests that Mn catalases of *Pyrobaculum calidifontis* and *Thermus thermophilus* display peroxidase activity toward phenolic compounds [14, 15]. Previously, the most applicable peroxidases mainly included fungal peroxidases and horseradish peroxidase. They both belong to a traditional group of heme-containing peroxidases that have inherent drawbacks, such as  $H_2O_2$ -induced inactivation and thermal instability. In contrast to traditional peroxidases, the peroxidase activity of catalases is considered to be more resistant against denaturation by heat and  $H_2O_2$ . These features make catalases an interesting alternative for typical peroxidase-based applications [16]. However, the full potential of catalases functioning as peroxidases remains unknown [14, 16, 17]. Thus, the peroxidase activity of YjqC toward phenolic compounds deserves further investigation.

As noted above, YjqC and CotA are both structural proteins of the spore outer coat, and they promote spore resistance to  $H_2O_2$  [13, 18]. On the other hand, the spore coat layer may have potential to improve the  $H_2O_2$  stability of YjqC and CotA. One argument for this possibility is that spore CotA is more thermostable and alkali-resistant than its free counterparts [19, 20]. Another piece of supporting evidence has is that enzymes immobilized onto the spore coat show enhanced enzyme stability against pH and temperature [21]. Recently, the spore outer coat has been used as excellent support surface for immobilization of enzymes [21, 22]. Thus, YjqC and CotA can be regarded as inherent enzymes immobilized on a spore surface [13, 23,

[24]. Spores containing CotA have also been directly used as biocatalysts for degrading synthetic dyes [19, 20]. Spore biocatalysts can also contribute to preventing the purification and immobilization of enzymes [25]. Moreover, the production of spores is also simple and economically beneficial for industrial applications [22]. However, there has been no effort to date to explore spore enzymes, such as YjqC and CotA, as multi-enzyme biocatalysts. A multi-enzyme biocatalyst comprising YjqC and CotA may be more highly resistant to H<sub>2</sub>O<sub>2</sub>-induced inactivation that blocks the broader use of fungal laccases and peroxidases.

In this study, YjqC of *B. altitudinis* SYBC hb4 demonstrated peroxidase activity toward the phenolic compounds sinapic acid (SA) and sinapine (SNP, the choline ester of SA) with H<sub>2</sub>O<sub>2</sub> as a co-substrate. CotA of *B. altitudinis* SYBC hb4, which is similar to homologous proteins from other *Bacillus* species, also exhibited catalytic oxidation toward SA and SNP [26–28]. Laccases and peroxidases typically transform phenolic substrates into oligomers that show less toxicity or lower bioactivity to organisms [5]. Apparently, CotA and YjqC of *B. altitudinis* SYBC hb4 may be two promising enzymes for the detoxification of SA and SNP. SA and SNP are two major antinutrients that hinder the development of valuable uses for rapeseed meal (RSM) [29]. The elimination of antinutrients is desirable for commercial utilization of RSM. It has been proposed that a multi-enzyme biocatalyst comprising different oxidative enzymes (e.g., laccase, peroxidases) are more preferable for the efficient degradation of phenolic compounds in biomass [4, 5, 30, 31]. Therefore, development of a synergistic multi-enzyme biocatalyst comprising CotA and YjqC may be necessary for efficient removal of SA and SNP from RSM. As mentioned above, spores just happen to have this multi-enzyme biocatalyst. In this study, *B. altitudinis* SYBC hb4 spores were assessed for biocatalysis toward SA and SNP. We also examined the possibility that *B. altitudinis* SYBC hb4 spores could be used for the degradation of SA and SNP in RSM.

## Materials and Methods

### Strain and Spore Production

The strain used for the experiments was *B. altitudinis* SYBC hb4 (*B. altitudinis* hb4), which was deposited in the China Center For Type Culture Collection (CCTCC No. M2015018). The strain was isolated from gall honey (the honeybee *Apis cerana* collected nectar from gall flowers), which was purchased from Apiary of Ba Ma Mi Yuan Co. Ltd., Bama, China [32, 33]. According to reports, an appropriate concentration of Mn<sup>2+</sup> was often used for promoting *Bacillus* sporulation [34]. Therefore, 0.15 mM MnCl<sub>2</sub> was used for improving production of spores by *B. altitudinis* hb4 in this study. Additionally, *Bacillus* CotA appears as a copper-dependent laccase [18, 35]. Thus, NMC medium (NB medium plus 0.15 mM MnCl<sub>2</sub> and 0.25 mM CuSO<sub>4</sub>) was used for production of activated *B. altitudinis* hb4 CotA, whereas the NM medium (NB medium plus 0.15 mM MnCl<sub>2</sub>) was used for production of spores with small amounts of laccase activity. The NB medium was composed of 10.0 g L<sup>-1</sup> peptone, 5.0 g L<sup>-1</sup> beef extract, 5.0 g L<sup>-1</sup> NaCl, pH 7.0–7.2 (with a background concentration of 0.3 μM Mn<sup>2+</sup>). The sporulation of *B. altitudinis* hb4 was initiated by inoculating 50 mL medium (loaded into 250-mL flask) with 1 mL of seed broth. The inoculated medium was incubated at 30°C with an oscillation speed of 200 rpm for 48 h. The chemicals and reagents were purchased from Sino-pharm Chemical Reagent Co. Ltd., Shanghai, China.

### Enzyme Assay

Laccase activity was measured using spectrophotometry at 50°C with 2, 2'-azino-bis (3-ethylbenzothiazoline-6-sulfonic acid) (ABTS, Sigma-Aldrich Co. LLC., Shanghai, China) as a substrate [28]. The oxidation of ABTS was monitored at 420 nm ( $\epsilon_{420} = 36 \text{ mM}^{-1} \text{ cm}^{-1}$ ). One unit

of laccase activity (U) was defined as the amount of laccase required to oxidize 1  $\mu\text{mol}$  ABTS per minute. Catalase activity was determined at 30°C by monitoring the decreased absorbance value of  $\text{H}_2\text{O}_2$  (Aladdin Chemical Reagent Co. Ltd., China) at 240 nm ( $\epsilon_{240} = 43.6 \text{ M}^{-1} \text{ cm}^{-1}$ ) [33]. One unit of catalase activity (U) was defined as the amount of catalase required to decompose 1  $\mu\text{mol}$   $\text{H}_2\text{O}_2$  per minute. Assays were conducted in a reaction mixture consisting of 2.4 mL 0.1 M citrate-phosphate (Sinopharm, China) buffer, 0.1 mL spore suspension or free enzyme, and 0.5 mL 1 mM ABTS or 50 mM  $\text{H}_2\text{O}_2$ . The activities of the spores and free enzymes were expressed in terms of U  $\text{OD}_{580}$  of spores<sup>-1</sup> and U  $\text{mg}^{-1}$  protein, respectively. In addition, isoenzyme analyses of catalases and laccases were performed with 8% polyacrylamide gel (Sinopharm, China) electrophoresis (PAGE) under non-denaturing conditions. The activity staining for catalases was conducted using a chromogenic probe containing isoniazid and pyrocatechol (Aladdin, China) [33]. The laccases were visualized with 10 mM DMP (Sigma, China) [36].

### Harvest and Purification of Spores

The harvest and purification of spores were performed as previously described [13, 23]. Briefly, the spores were harvested by centrifugation (8000 rpm, 20 min, 4°C), and then the pellets were suspended in wash solution containing 2.5  $\mu\text{g mL}^{-1}$   $\text{MgSO}_4$ , 200  $\mu\text{g mL}^{-1}$  lysozyme and 2  $\mu\text{g mL}^{-1}$  DNase I (all purchased from Sinopharm, China). After 30 min of incubation at 37°C, the suspensions were heat-treated (80°C, 45 min) to ensure destruction of residual vegetative cells. The purified spores were free (>99%) of growing cells, germinated spores and cell debris. The purification was checked using a light microscope (Nikon Eclipse E200MV, Japan) and transmission electron microscopy (Hitachi TEM system, Japan). The purified spores were re-suspended in 0.1 M citrate-phosphate buffer (pH 7.0) at -20°C until use.

### Isolation of Spore Coat Proteins

The spores were extensively washed with distilled water and then decoated with the alkaline decoating method [37]. Briefly, the spore coat layer was stripped with a detergent solution consisting of 0.1 M NaOH, 0.1 M NaCl, 0.1 M dithiothreitol (DTT) and 0.5% sodium dodecyl sulfate (SDS). The stripping process involved incubating spores in 1 mL of the detergent solution at 70°C for 30 min. Then the residual spores were removed by centrifugation, and the supernatant was dialyzed against deionized water for 24 h in an ice bath. After dialysis, the supernatant was concentrated using an ultrafiltration centrifuge tube (Millipore, Bedford, MA). A blend of the concentrated supernatant and loading buffer (62.5 mM Tris-HCl, 10% glycerol, 2% SDS, 1% 2-mercaptoethanol, 0.003% bromophenol blue, pH 6.8) was boiled for 5 min. The boiled solution (approximately 50  $\mu\text{L}$ ) was analyzed with 12% SDS-PAGE and stained with Coomassie brilliant blue R-250. The clear bands were cut horizontally into slices (1.5 mm wide) for MALDI-TOF MS analysis. Dithiothreitol and 2-mercaptoethanol were both purchased from Sigma-Aldrich (Shanghai, China), and the rest of the ingredients were purchased from Sinopharm (Shanghai, China).

### MALDI-TOF MS Analyses of Spore Coat Proteins

The MALDI-TOF MS analyses of proteins were performed as described earlier [33]. In-gel digestion of proteins was conducted using the modified method described previously [13]. For identifying proteins, Mascot 2.1 (Matrix Science, <http://www.matrixscience.com>) was utilized to analyze mass spectrometry data. The parameters used by Mascot were as follows: trypsin was the specific enzyme; the ions score was  $-10 \cdot \text{Log}(P)$ , where  $P$  was the probability that the observed match was a random event; individual ions scores > 57 indicated identity or extensive

homology ( $P < 0.05$ ); and protein scores were derived from ions scores as a non-probabilistic basis for ranking protein hits.

## Purification of CotA and YjqC from Spores

The spores were suspended in 0.1 M Tris-HCl buffer (pH 7.6) containing 1 mg mL<sup>-1</sup> lysozyme and 1 mM phenylmethanesulfonyl fluoride (protease inhibitor, Sinopharm), then incubated at 37°C for 1 h with constant oscillation at 120 rpm. Then the spores were subjected to an intermittent ultrasonic crush for 30 min on ice. The crude lysate was separated from cellular debris by centrifugation at 10,000 rpm at 4°C for 30 min. The resulting supernatant was the crude enzyme. The purification of CotA and YjqC was conducted using a previously described method [33]. The main steps of the purification were, in order, fractional precipitation, ion exchange and gel filtration chromatography. The main procedures were performed on an Äkta Avant system (GE-Healthcare). The protein concentration of each fraction was determined with a Bradford assay. The purity of the protein fractions was analyzed by 12% SDS-PAGE.

## Characterization of CotA and YjqC

To characterize CotA and YjqC, the effects of temperature, pH and substrate concentration on their activity were assayed. The effects of pH and temperature on the activity of CotA toward ABTS were determined for pH values ranging from 3.0 to 8.0 (50 mM citrate-phosphate buffer) and temperatures ranging from 25 to 90°C. The stability of CotA under the optimum pH and temperature was determined by monitoring residual laccase activity during a 12 h incubation in 50 mM citrate-phosphate buffer. The optimal kinetic parameters of CotA were determined using different concentrations of ABTS (0.05–0.35 mM). The Michaelis-Menten constant ( $K_M$ ) and maximal reaction velocity ( $V_{max}$ ) of CotA were estimated by linear regression from double reciprocal plots according to a Lineweaver and Burk plot. The assays were also used for characterizing YjqC. In the assays, the laccase and catalase activity were both defined as relative activity, and the highest activity was regarded as 100%. Spore YjqC and spore CotA were also characterized with these assays but the free enzyme was replaced with spore suspension.

## CotA- and YjqC-Catalyzed Oxidation of SA and SNP

The CotA- and YjqC-catalyzed oxidation of SA and SNP were measured using a previously described method [28]. Briefly, the assay was performed in a reaction mixture containing 2.4 mL 50 mM citrate-phosphate buffer, 0.5 mL substrate (SA or SNP), and 0.1 mL of the enzyme solution or spore suspension. The oxidation of SA and SNP were monitored by decreases in absorbance at 307 nm ( $\epsilon_{307} = 16,500 \text{ M}^{-1} \text{ cm}^{-1}$ ) and 326 nm ( $21,350 \text{ M}^{-1} \text{ cm}^{-1}$ ), respectively [38]. An appropriate concentration of H<sub>2</sub>O<sub>2</sub> was required for initiating the peroxidase activity of YjqC toward SA and SNP. For the YjqC-catalyzed oxidation of SA and SNP, a co-substrate of 0.1 mL 50 mM H<sub>2</sub>O<sub>2</sub> was added to the reaction mixture to drive the reaction. Meanwhile, the same methods used for CotA were used to determine the optimal YjqC-catalyzed oxidation of SA and SNP. The kinetic parameters of CotA and YjqC toward SA and SNP were also assayed. The effects of H<sub>2</sub>O<sub>2</sub> concentrations (0–30 mM) on the peroxidase activity of YjqC were also assayed. SA and SNP were both purchased from Baoman Biotech Co. Ltd., Shanghai, China.

## H<sub>2</sub>O<sub>2</sub> Stability Assay

The H<sub>2</sub>O<sub>2</sub> stability of YjqC and CotA was determined by a method described earlier [3]. The half-inhibition concentration (IC<sub>50</sub>) values of H<sub>2</sub>O<sub>2</sub> against the activity of CotA were determined

by incubating free CotA with variable H<sub>2</sub>O<sub>2</sub> concentrations (0–40 mM). The half-life of CotA was determined by incubating CotA with different concentrations of H<sub>2</sub>O<sub>2</sub> (0–30 mM) for 0–180 min. The time (min) until the enzymes exhibit 50% residual activity was used to compare the activity stability of CotA under different concentrations of H<sub>2</sub>O<sub>2</sub>. The concentration of H<sub>2</sub>O<sub>2</sub> that inhibited 50% of CotA residual activity was used for determining the tolerance of CotA to inhibition by H<sub>2</sub>O<sub>2</sub>. The residual activity was determined following the same procedure as the activity assay for CotA.

## RSM Treated with Spores

Samples of RSM were purchased from the local market in Wuxi, China. The spore suspension was prepared by suspending spores in 0.1 M citrate-phosphate buffer. Approximately 10 g of RSM was blended with 40 mL of treatment agent in a 50-ml capped test tube and incubated at 45°C for 18 h. The treatment agents were prepared as the spore suspension (OD<sub>580</sub> = 10) plus 0 or 15 mM H<sub>2</sub>O<sub>2</sub>. RSM treated with the isometric citrate-phosphate buffer was used as a control. During 18 h of incubation, residual RSM was collected every 6 h for measuring SA and SNP.

## Extraction and Quantification of SA and SNP

SA and SNP were extracted from RSM using a modified method from Niu et al [39]. Briefly, extraction was conducted using refluxing with 80% ethanol for 4.5 h at 80°C (the solvent-to-RSM ratio was 15:1 v/w). The extracted solutions were collected and concentrated with a rotary evaporator. The concentrated solution was analyzed for SA and SNP using HPLC.

The quantification of SA and SNP was performed using Eclipse XDB-C18 column (Agilent, 5 μm, 4.6×250 mm) by Chromaster CM5110 with a DAD detector (HITACHI, Japan) following a previously described method [40]. Briefly, gradient elution was conducted using 10% methanol containing 2% acetic acid (pH 3.2) as solvent A, and 100% methanol as solvent B. The gradient of solvent B was set as 10, 20, 45, 70, 100, 100 and 10% B at 0, 7, 20, 25, 28, 31 and 40 min, respectively. The column was incubated at 25°C with a 0.8 mL/min flow rate. A volume of 10 μL of each sample was injected into the HPLC-DAD for analysis via an automatic sampler (Hitachi CM 5210 Auto Sampler). The chromatograms were acquired at 330 nm. The relative retention times of SA and SNP were identified by comparing peaks with their authentic standards. The contents of SA and SNP were quantified using the calibration curves generated from plotting the concentration of their corresponding standards against the area. The contents of SA and SNP in RSM were both expressed as the amount (mg) of SA or SNP per gram of RSM (mg/g).

## Statistical Analysis

The experiments were repeated 3 times with 3 replicates for the spore preparations, RSM treatments, and extractions of SA and SNP. The assays were performed in triplicate for characterizing CotA and YjqC, as well as the catalytic oxidation of SA and SNP. The results were expressed as the mean values and standard deviations (Mean ± SD). Data was statistically evaluated with SPSS base 16.0 software. All the figures were drawn using Origin 8.0.

## Results and Discussion

### Localization of CotA and YjqC in the Spore Coat

As shown in [Fig 1A and 1B](#), the purified spores were free of vegetative cells and cellular debris. The average size of the spores was approximately 1.2 μm in length and 0.5 μm in width. The spore coat extracts were separated and analyzed by 12% SDS-PAGE ([Fig 1C](#)). Ten distinct

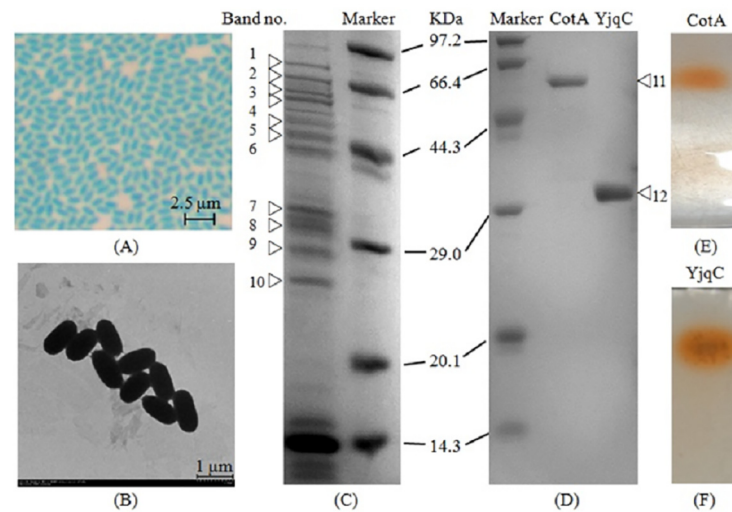

**Fig 1.** (A) Light micrograph of spores stained with malachite green. (B) Transmission electron micrograph of spores. (C) SDS-PAGE of the spore coat fraction extracted from *B. altitudinis* SYBC hb4 spores. (D) SDS-PAGE of the purified CotA and YjqC. (E) PAGE of laccases extracted from spores. (F) PAGE of catalases extracted from spores.

doi:10.1371/journal.pone.0158351.g001

protein bands were excised and analyzed by MALDI-TOF MS (Band no. 1–10). The results (summarized in Table 1) indicated that the fourth and seventh bands were identified as CotA and a sporulation-related manganese catalase (YjqC), respectively. Evidently, the spore coat extracts of *B. altitudinis* hb4 were similar to extracts of other *Bacillus* species (e.g., *B. subtilis* and *B. pumilus*). SOD was also detected in the spore coat extracts (the tenth band) of *B. altitudinis* hb4. SOD was shown to be an indispensable protein involved in the maturation of spores [13].

Previously, more than 91 spore coat proteins have been identified in *B. subtilis* via SDS-PAGE, 2-DE gels, analysis of protein localization, genome-wide transcriptome and “gel-free” protocols [23]. In this study, only ten proteins were identified in the spore coat fraction, which likely occurred due to the sole use of SDS-PAGE for protein separation. The spore coat extraction method might also need improvement. Currently, YjqC has been detected in *B. subtilis* and *B. pumilus* according to the latest information from the NCBI database (<http://www.ncbi.nlm.nih.gov/gene/>). Based on the above MALDI-TOF MS analyses of spore coat proteins, *B. altitudinis* hb4 contains a homologous protein of *B. pumilus* YjqC.

In our previous work, the *yjqC* gene (KF857273) was cloned from the genome of *B. altitudinis* hb4. The deduced amino acid sequence (AHI58963.1) was obtained for phylogenetic analysis and conservation analysis. The sequence conservation (Table 2) showed that *B. altitudinis* hb4 YjqC had a 99% sequence identity to homologous proteins in *B. altitudinis*, *B. pumilus* and *B. aerophilus*. In contrast, the sequence exhibited 67, 84 and 84% sequence identity to homologous proteins from *B. licheniformis*, *B. subtilis* and *B. amyloliquefaciens*, respectively. The phylogenetic tree also indicated that YjqC of *B. altitudinis* hb4 had the closest relationship to *Bacillus pumilus* manganese catalase (Fig A in S1 File). Moreover, the peptides of homologous proteins identified by MALDI-TOF MS could perfectly match with the deduced amino acid sequence of *B. altitudinis* hb4 YjqC. Thus, *B. altitudinis* hb4 YjqC could be identified as a Mn catalase.

Similar outcomes were also observed for CotA in *B. altitudinis* hb4. The cloning procedure for the *B. altitudinis* hb4 CotA gene (KU363621) was similar to that of *yjqC* [33]. The deduced

**Table 1. Identification of proteins extracted from spore coat fraction of *B. altitudinis* SYBC hb4.**

| BandNo. <sup>a</sup> | Identified protein                            | Accession No.  | Mass   | %Sequencecoverage | Mascotscore <sup>b</sup> | Peptide (s)                                                                                                                  |
|----------------------|-----------------------------------------------|----------------|--------|-------------------|--------------------------|------------------------------------------------------------------------------------------------------------------------------|
| 1                    | Endopeptidase                                 | WP_012011662.1 | 86,455 | 2                 | 88                       | R.VLGGPGSGTTENVLAGIDR.A                                                                                                      |
| 2                    | Peptide ABC transporter ATP binding protein   | WP_007496735.1 | 66,300 | 8                 | 240                      | K.VAEVIQSNFEK.V<br>K.FHDGTFDFAEAVK.F<br>K.SGDSFRENVPVGTGPFK.F                                                                |
| 3                    | Oligopeptide binding protein                  | WP_007499033.1 | 61,986 | 6                 | 191                      | K.VREDIAVVVQQQLK.E<br>K.HILGDVPIKDLGENEFNR.K                                                                                 |
| 4                    | CotA                                          | WP_012009087.1 | 58,882 | 6                 | 117                      | R.DFEATGPFPER.E<br>K.VWPYLEVEPR.K                                                                                            |
| 5                    | Spore peptidoglycan hydrolase                 | WP_007496056.1 | 50,407 | 8                 | 96                       | K.AVSPQQAIAIAR.E<br>R.ENNVSLYDETAQAPYFR.Y                                                                                    |
| 6                    | Hypothetical protein                          | WP_012011041.1 | 49,057 | 3                 | 76                       | R.LSQGEFLFTFDAR.D                                                                                                            |
| 7                    | Sporulation related manganese catalase (YjqC) | WP_012010687.1 | 31,115 | 21                | 254                      | R.ANLNAESQGR.L<br>R.EGDVVVPTTFPR.S<br>K.QQVSYDLFNFGR.G<br>K.ELEEREGDVVPTTFPR.S                                               |
| 8                    | Spore coat-associated protein                 | WP_007501219.1 | 29,157 | 7                 | 97                       | K.ENSGAINLANIKPGDR.I                                                                                                         |
| 9                    | Transglutaminase                              | WP_012011070.1 | 28,507 | 10                | 99                       | K.SGASFAIFQR.S<br>R.QASDLLFEVTLR.S                                                                                           |
| 10                   | SOD                                           | WP_007501264.1 | 22,397 | 24                | 233                      | K.HHNTYVTNLNK.A<br>R.FSGGAWLVVNNNGK.L<br>K.LEITSTPNQDSPLTEGK.T                                                               |
| 11                   | Purified CotA                                 | WP_012009087.1 | 58,882 | 10                | 138                      | R.DFEATGPFPER.E<br>K.VWPYLEVEPR.K<br>R.TLTLTGTQDK.Y<br>R.LGSVEVWSIVNPTR.G                                                    |
| 12                   | Purified YjqC                                 | WP_012010687.1 | 31,115 | 33                | 427                      | K.ELQYEAKPSKPDPLYAK.K<br>K.YIIASGNLMADFR.A<br>R.ANLNAESQGR.L<br>R.EGDVVVPTTFPR.S<br>K.QQVSYDLFNFGR.G<br>K.ELEEREGDVVPTTFPR.S |

<sup>a</sup> Band No. of proteins marked in Fig 1C and 1D

<sup>b</sup> Individual ions scores > 57 indicate identity or extensive homology (P < 0.05)

doi:10.1371/journal.pone.0158351.t001

amino acid sequence showed high sequence homology (99%) to CotA of *B. altitudinis*, *B. pumilus* and *B. aerophilus* (Table 2). In contrast, the homologous CotA from *B. licheniformis*, *B. amyloliquefaciens* and *B. subtilis* exhibited 61, 66 and 68% sequence identity with *B. altitudinis* hb4 CotA, respectively. The phylogenetic tree also suggested that *B. altitudinis* hb4 CotA shared a close relationship with CotA of *B. altitudinis* and *B. pumilus* (Fig A in S1 File).

**Table 2. Sequence conservation (shown as % identity) of CotA and YjqC among *Bacillus* species.**

| Protein | % identity of <i>B. altitudinis</i> SYBC hb4 VS. |                   |                      |                    |                             |                         |
|---------|--------------------------------------------------|-------------------|----------------------|--------------------|-----------------------------|-------------------------|
|         | <i>B. altitudinis</i>                            | <i>B. pumilus</i> | <i>B. aerophilus</i> | <i>B. subtilis</i> | <i>B. amyloliquefaciens</i> | <i>B. licheniformis</i> |
| CotA    | 99                                               | 99                | 99                   | 68                 | 66                          | 61                      |
| YjqC    | 99                                               | 99                | 99                   | 84                 | 84                          | 67                      |

doi:10.1371/journal.pone.0158351.t002



From the above results, *B. altitudinis* hb4 CotA and YjqC both have extensive homology to homologous proteins of *B. pumilus*. *B. pumilus* exhibited a higher resistance against H<sub>2</sub>O<sub>2</sub> and heat than other Bacilli, such as *B. subtilis* or *B. licheniformis* [41]. Recently, a heat stable CotA laccase has been identified in *B. pumilus* [42]. According to polyphasic taxonomy, the *B. pumilus* group comprises five species, including *B. pumilus*, *B. safensis*, *B. altitudinis*, *B. xiamenensis* and *B. invictae* [43]. Therefore, we could propose that *B. altitudinis* might exhibit similar H<sub>2</sub>O<sub>2</sub> resistance to that of *B. pumilus*. Our previous work also strongly suggested that *B. altitudinis* hb4 was highly resistant to H<sub>2</sub>O<sub>2</sub> [32, 33]. The enhanced resistance of *B. pumilus* spores to H<sub>2</sub>O<sub>2</sub> was largely attributed to the spore coat proteins CotA and YjqC [13, 41]. However, past studies paid little attention to the H<sub>2</sub>O<sub>2</sub> resistance of CotA and YjqC in *B. pumilus* or *B. altitudinis*. The research presented in this study demonstrated that *B. altitudinis* hb4 CotA and YjqC were highly resistant to H<sub>2</sub>O<sub>2</sub>.

### Purification of YjqC and CotA

The zymogram analyses showed that *B. altitudinis* hb4 spores harbored only one laccase and catalase (Fig 1E and 1F). The YjqC and CotA were purified from *B. altitudinis* hb4 spores using the multistep processes listed in Table 3. Analysis by SDS-PAGE (Fig 1D) showed that the purified catalase and laccase appeared as two single bands at ~31 KDa (Band no. 12) and ~58 KDa (Band no. 11), respectively.

These two bands were also analyzed by the MALDI-TOF MS. The identified peptides of the purified catalase and laccase were listed in Table 1. The results showed that the purified catalase and laccase were homologous YjqC and CotA from *B. pumilus*. Moreover, these identified peptides could match fragments of the deduced amino acid sequences for *B. altitudinis* hb4 YjqC and CotA. The YjqC was purified 8.3-fold with a final yield of 12.3%. The purified YjqC showed approximately 3161.7 U mg<sup>-1</sup> protein of specific activity. The specific activity of the purified CotA was approximately 1.81 U mg<sup>-1</sup> protein (with ABTS as a substrate). The CotA was purified 7.2-fold with a final yield of 31.6%. In the following, catalytic activity and stability of the purified CotA (Fig 2) and YjqC (Fig 3) toward substrates were determined under different pH and temperatures conditions. Meanwhile, the purified CotA and YjqC were also assayed for kinetic parameters under different concentrations of substrates (Fig 4).

### Characterization of CotA

As shown in Fig 2A and 2B, the free CotA could catalyze oxidation of ABTS for a pH range of 3.0–7.0 and a temperature range of 25–90°C. CotA showed optimum activity toward ABTS at pH 4.0 and 80°C. This outcome was similar to the optimal conditions for laccases from other *Bacillus* species (Table A in S2 File). The free CotA showed gradually increased laccase activity under 0.03–0.33 mM ABTS (Fig 4D). The dependence of the oxidation rate on ABTS concentration followed Michaelis–Menten kinetics. The kinetic parameters of CotA were determined and summarized in Table 4.

The  $K_M$  value of the free CotA toward ABTS was 88  $\mu$ M. The free CotA had a higher affinity for ABTS than CotA of *B. subtilis* and laccase-like multicopper oxidase of *B. clausii* (Table A in S2 File). Its  $K_M$  value was much higher than the value for laccase from *B. licheniformis*, *B. coagulans* and *B. vallismortis*. The free CotA of *B. altitudinis* hb4 showed a similar affinity for ABTS to *B. pumilus* CotA. However, its  $k_{cat}/K_M$  was lower than the value for *B. pumilus* CotA. In conclusion, compared with laccases from *Bacillus* species, *B. altitudinis* hb4 CotA did not appear to be a powerful catalyst for the oxidation of ABTS.

**Table 3. Purification of YjqC and CotA from *B. altitudinis* SYBC hb4 spores.**

| Purification step                                      | Total activity (U) |       | Total protein (mg) |      | Specific activity (U mg <sup>-1</sup> ) |        | Yield (%) |      | Purification (fold) |      |
|--------------------------------------------------------|--------------------|-------|--------------------|------|-----------------------------------------|--------|-----------|------|---------------------|------|
|                                                        | CotA               | YjqC  | CotA               | YjqC | CotA                                    | YjqC   | CotA      | YjqC | CotA                | YjqC |
| Crude extract                                          | 30.4               | 46240 | 121                | 121  | 0.25                                    | 382.1  | 100       | 100  | 1                   | 1    |
| 40–80% (NH <sub>4</sub> ) <sub>2</sub> SO <sub>4</sub> | 23.3               | 25110 | 48.6               | 36.4 | 0.48                                    | 689.8  | 76.6      | 54.3 | 1.9                 | 1.8  |
| DEAE sepharose FF                                      | 17.0               | 7985  | 13.5               | 8.9  | 1.26                                    | 897.2  | 55.9      | 17.3 | 5.0                 | 2.3  |
| Superdex 200                                           | 9.6                | 5691  | 5.3                | 1.8  | 1.81                                    | 3161.7 | 31.6      | 12.3 | 7.2                 | 8.3  |

doi:10.1371/journal.pone.0158351.t003

### Characterization of YjqC

The free YjqC was active within a pH range of 3.0–9.0 with optimal activity at pH 7.0 (Fig 3A). It was active in the temperature range of 25–90°C with a maximum activity at 35°C (Fig 3B). Its catalase activity showed a trend of rising first and then falling when exposed to 5–50 mM

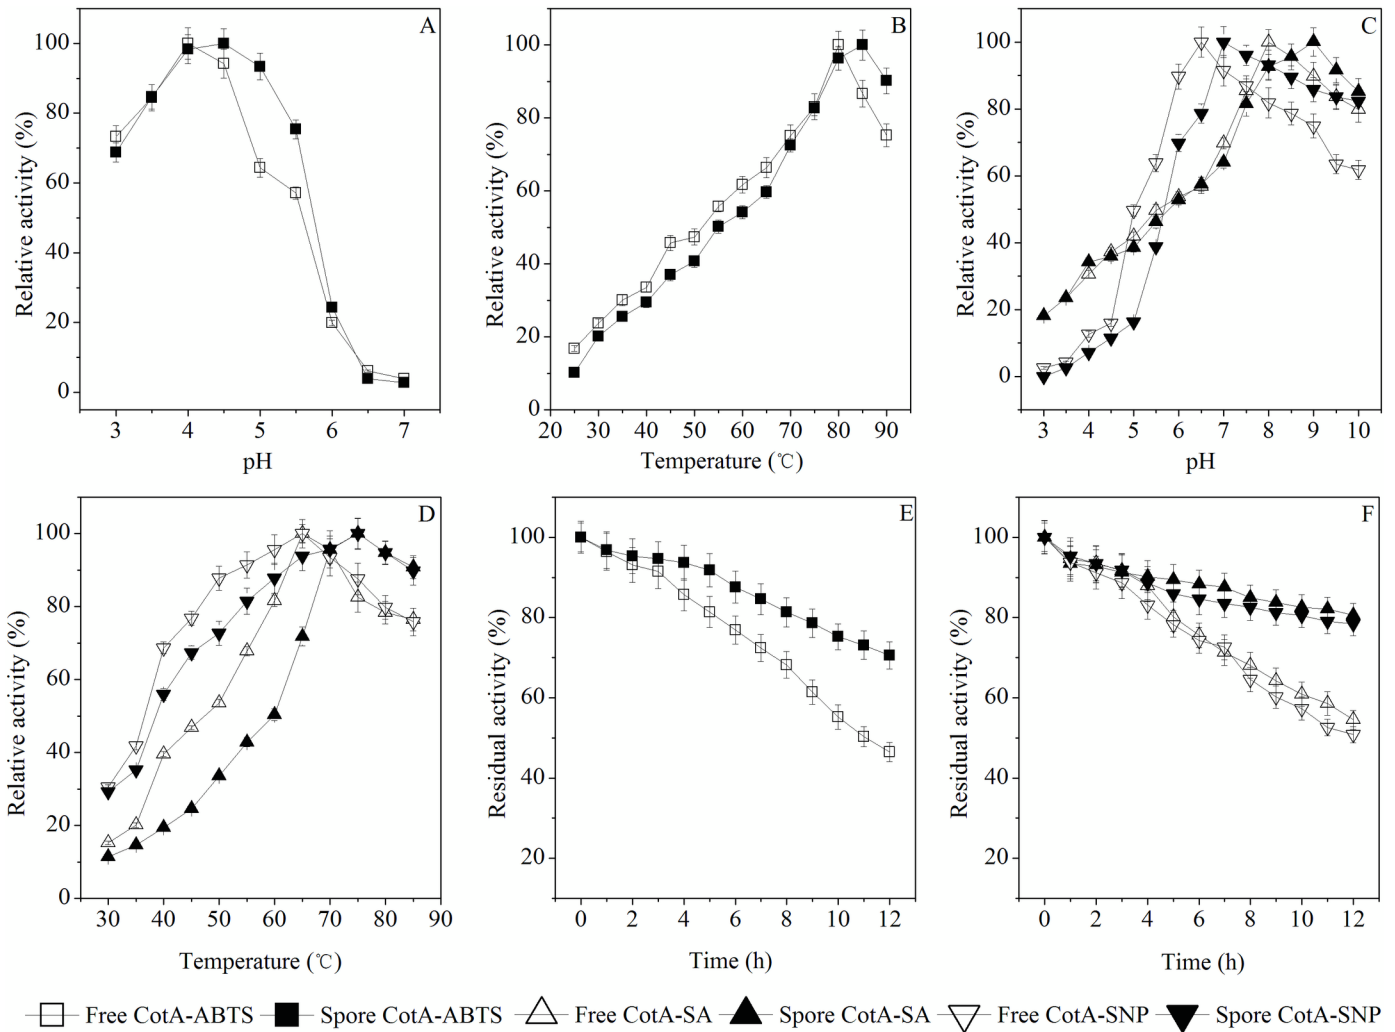

**Fig 2. Optimal activity of the free and spore CotA.** Laccase activity toward ABTS under different pH (A) and temperature (B) conditions. Laccase activity toward SA and SNP under different pH (C) and temperature (D) conditions. Stability of laccase activity toward ABTS (E), SA and SNP (F) under optimal pH and temperature conditions.

doi:10.1371/journal.pone.0158351.g002

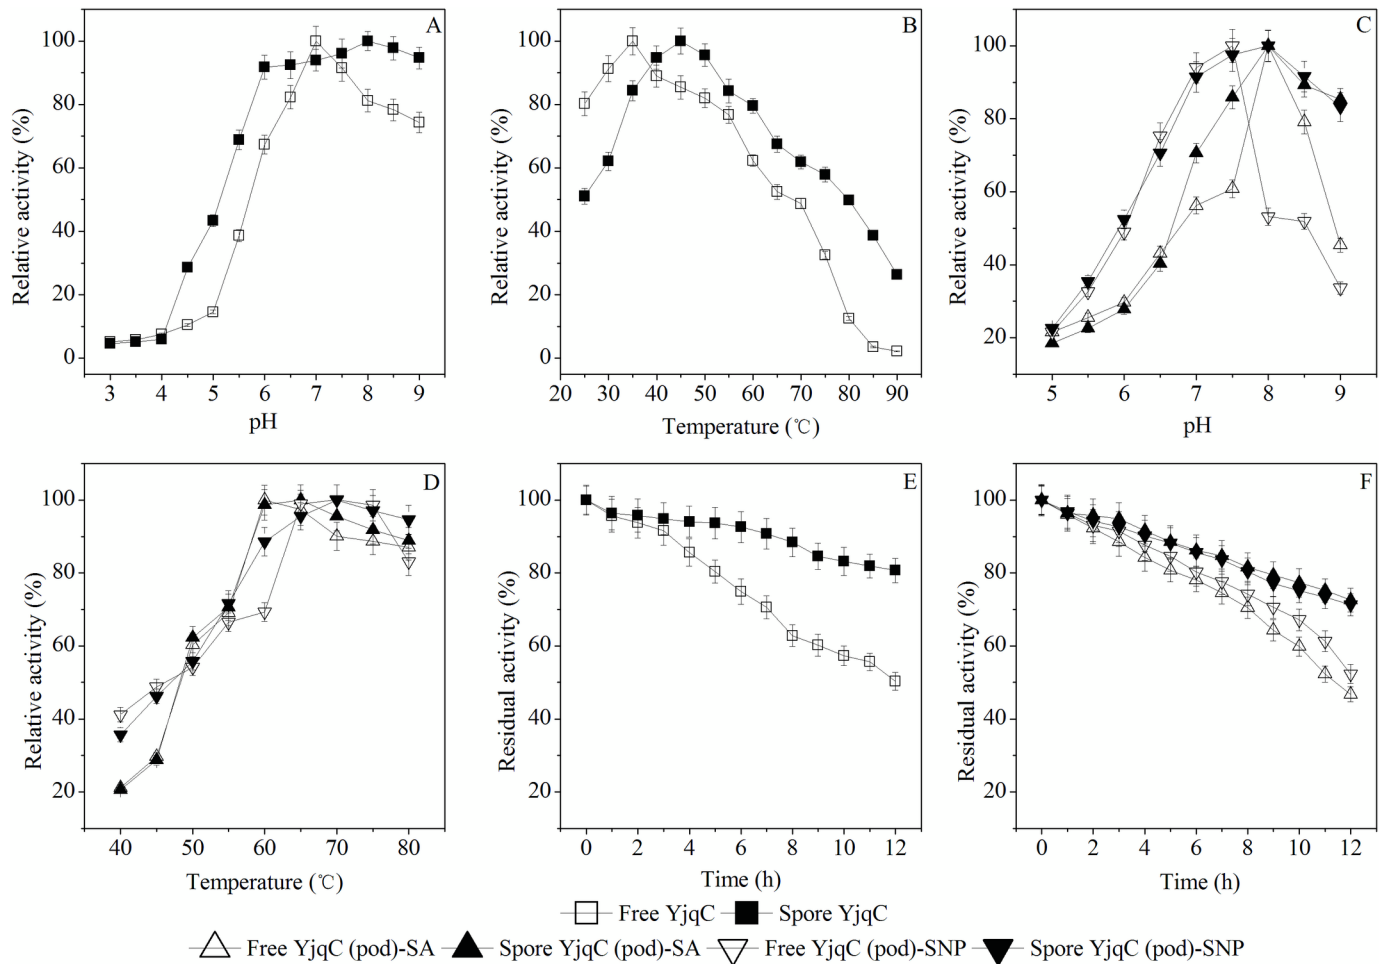

**Fig 3. Optimal activity of the free and spore YjqC.** Catalase activity under different pH (A) and temperature (B) conditions. Peroxidase activity toward SA and SNP under different pH (C) and temperature (D) conditions. Stability of catalase (E) and peroxidase (F) activity under optimal pH and temperature conditions.

doi:10.1371/journal.pone.0158351.g003

H<sub>2</sub>O<sub>2</sub> (Fig 4A). The catalase activity of YjqC followed Michaelis–Menten kinetics when the concentration of H<sub>2</sub>O<sub>2</sub> was less than 30 mM. The kinetic parameters of YjqC are also summarized in Table 4. The free YjqC exhibited a K<sub>M</sub> of 23.5 mM and a k<sub>cat</sub>/K<sub>M</sub> of 0.07 μM<sup>-1</sup>s<sup>-1</sup>. Compared to typical Mn catalases from *L. plantarum* and *T. thermophilum* (Table B in S2 File), *B. altitudinis* hb4 YjqC showed a much higher affinity toward H<sub>2</sub>O<sub>2</sub>. However, the k<sub>cat</sub>/K<sub>M</sub> value of YjqC was lower than the value of Mn catalases from *P. calidifontis*, *L. plantarum*, *T. thermophilum*, *T. album* and *T. fusca* (Table B in S2 File). Although these enzymes are widely distributed in *Bacillus* spores, there are unfortunately few reports about the kinetic properties of *Bacillus* Mn catalases.

### CotA-Catalyzed Oxidation of SA and SNP

As shown in Fig 2C and 2D, the free CotA could catalyze oxidization of SA and SNP in a pH range of 3.0–10.0 and a temperature range of 30–85°C. The optimal conditions for CotA to oxidize SA were pH 8.0 and 65°C. The optimal conditions for CotA to oxidize SNP were pH 6.5 and 65°C. With increases in SA (0.02–0.10 mM) and SNP (0.034–0.17 mM), the free CotA exhibited increased catalytic activity (Fig 4E and 4F). The kinetic parameters of the free CotA

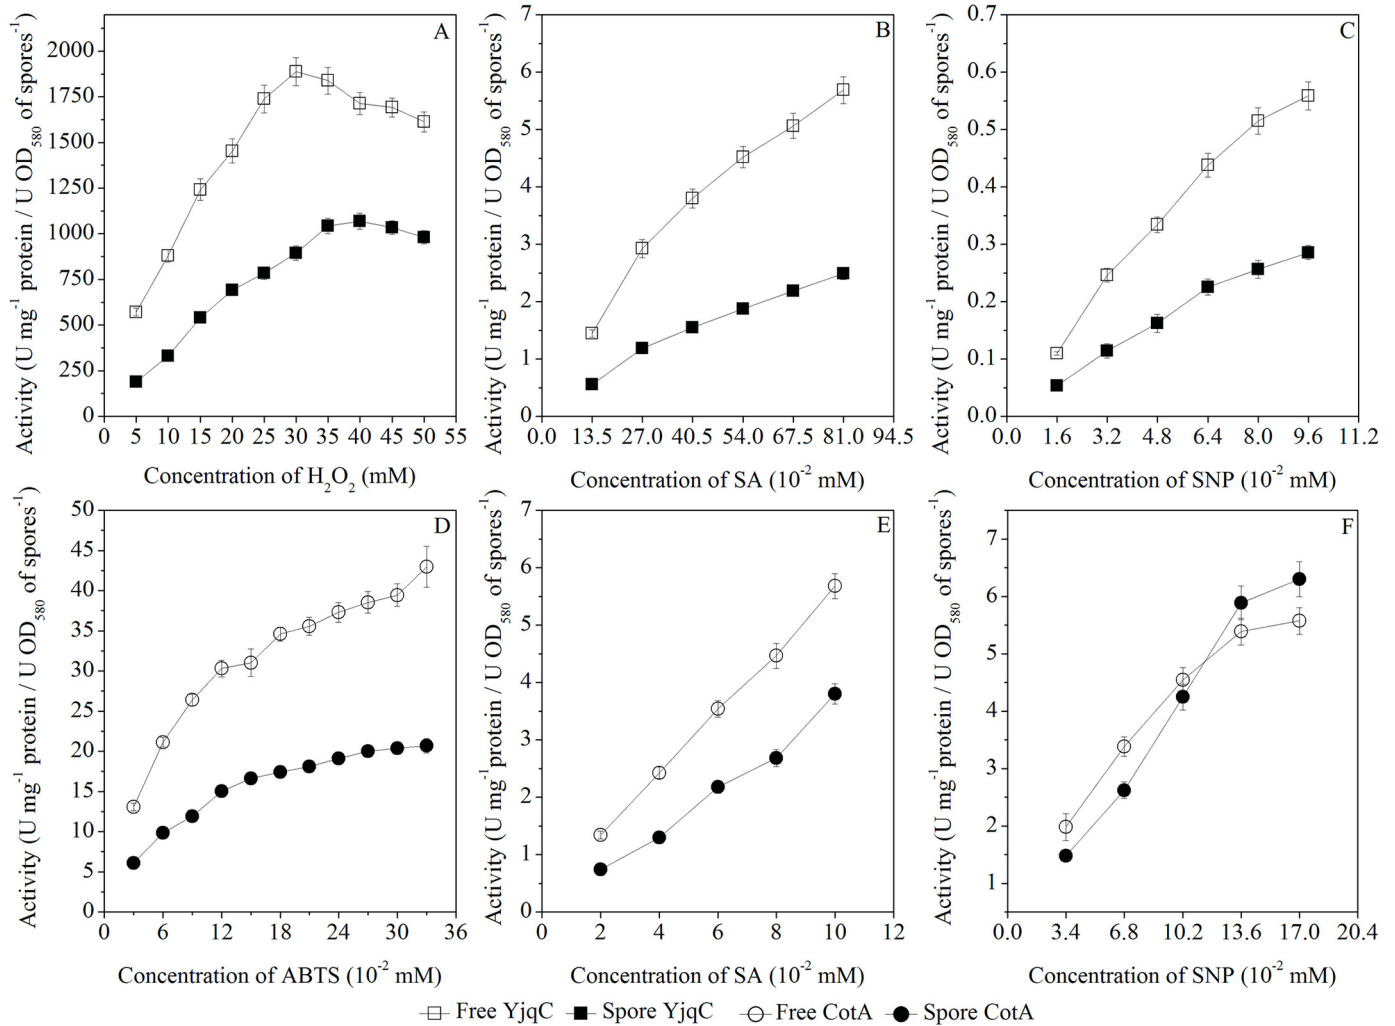

**Fig 4. Effects of substrate concentrations on enzyme activity.** Catalase activity of the free and spore YjqC under different concentrations of H<sub>2</sub>O<sub>2</sub> (A). Peroxidase activity of the free and spore YjqC toward different concentrations of SA (B) and SNP (C). Laccase activity of the free and spore CotA toward different concentrations of ABTS (D), SA (E) and SNP (F).

doi:10.1371/journal.pone.0158351.g004

**Table 4. Characteristics of YjqC and CotA purified from *B. altitudinis* SYBC hb4 spores.**

| Enzyme               | Substrate                                       | K <sub>M</sub> (μM) | V <sub>max</sub> (U mg <sup>-1</sup> or OD <sub>580nm</sub> <sup>-1</sup> ) | k <sub>cat</sub> (s <sup>-1</sup> ) | k <sub>cat</sub> /K <sub>M</sub> (μM <sup>-1</sup> s <sup>-1</sup> ) | V <sub>max</sub> /K <sub>M</sub> <sup>b</sup> |
|----------------------|-------------------------------------------------|---------------------|-----------------------------------------------------------------------------|-------------------------------------|----------------------------------------------------------------------|-----------------------------------------------|
| Free YjqC/Spore YjqC | H <sub>2</sub> O <sub>2</sub>                   | 23525/102815        | 3195/4010                                                                   | 1650/-                              | 0.07/-                                                               | -/0.039                                       |
|                      | H <sub>2</sub> O <sub>2</sub> +SA <sup>a</sup>  | 1297/2295           | 15.62/10.17                                                                 | 8.1/-                               | 0.006/-                                                              | -/0.004                                       |
|                      | H <sub>2</sub> O <sub>2</sub> +SNP <sup>a</sup> | 1600/8000           | 11.32/27.01                                                                 | 5.8/-                               | 0.004/-                                                              | -/0.003                                       |
| Free CotA/Spore CotA | ABTS                                            | 88/107              | 51.45/27.6                                                                  | 50.3/-                              | 0.57/-                                                               | -/0.26                                        |
|                      | SA                                              | 308/909             | 21.79/33.8                                                                  | 21.3/-                              | 0.069/-                                                              | -/0.037                                       |
|                      | SNP                                             | 163/1077            | 11.54/47.6                                                                  | 11.3/-                              | 0.069/-                                                              | -/0.044                                       |

<sup>a</sup> The concentration of H<sub>2</sub>O<sub>2</sub> was 20 mM

<sup>b</sup> The unit was expressed as min<sup>-1</sup> OD<sub>580nm</sub> of Spores<sup>-1</sup>

doi:10.1371/journal.pone.0158351.t004

toward SA and SNP were determined and summarized in [Table 4](#). The  $K_M$  value of the free CotA was approximately 308  $\mu\text{M}$  for SA. Compared with fungal laccases, *B. altitudinis* hb4 CotA exhibited a lower affinity toward SA ([Table C in S2 File](#)), but it had much higher affinity for SA than *B. subtilis* CotA. The catalytic efficiency of *B. altitudinis* hb4 CotA was also lower than fungal laccases and *B. subtilis* CotA. Previous studies have demonstrated that *Bacillus* CotA is a potent biocatalyst used for bioconversion of SA into valuable derivatives [[44](#)]. The kinetic parameters of *B. altitudinis* hb4 CotA were comparable to other CotA from *B. subtilis* and *B. licheniformis* [[27](#), [28](#)]. However, the CotA-catalyzed oxidation of SNP received less attention. The above results suggest that CotA is also efficient in catalyzing the oxidation of SNP. The free CotA showed similar  $k_{\text{cat}}/K_M$  values (both approximately  $0.069 \mu\text{M}^{-1} \text{s}^{-1}$ ) toward SA and SNP. However, from the  $K_M$  values, the free CotA showed a much higher affinity toward SNP than toward SA. According to recent studies, the kinetic parameters of CotA toward SNP have been reported only a few times.

### YjqC-Catalyzed Oxidation of SA and SNP

As shown in [Fig 3C and 3D](#), the free YjqC could catalyze the oxidation of SA and SNP under a pH range of 5.0–9.0 and a temperature range of 40–80°C. The optimal pH values for the free YjqC toward SA and SNP were 8.0 and 7.5, respectively. The optimal temperatures for the free YjqC toward SA and SNP were 60 and 70°C, respectively. As shown in [Fig 5A](#), the free YjqC exhibited increased peroxidase activity toward SA and SNP (1 mM of final concentration) as the  $\text{H}_2\text{O}_2$  concentration increased until 20 mM. A certain amount of  $\text{H}_2\text{O}_2$  is the co-substrate used for driving peroxidase activity for the free YjqC [[26](#)]. In the presence of 20 mM  $\text{H}_2\text{O}_2$ , free YjqC exhibited increased peroxidase activity toward SA (0.135–0.81 mM) and SNP (0.016–0.096 mM) ([Fig 4B and 4C](#)). The kinetic parameters of YjqC toward SA and SNP followed Michaelis–Menten kinetics. As shown in [Table 4](#), the  $K_M$  values suggested that YjqC had a higher affinity for SA than SNP. The  $k_{\text{cat}}/K_M$  values also suggested that the free YjqC exhibited a higher catalytic efficiency toward SA than SNP. Compared to CotA, the YjqC has a higher  $K_M$  value toward SA than SNP. Their  $k_{\text{cat}}/K_M$  values suggest that the catalytic efficiencies of the YjqC toward SA and SNP are inferior to the efficiencies of CotA.

Based on above analyses, we confirmed that YjqC has peroxidase activity toward SA and SNP. According to what we have learned, this is the first report about the peroxidase activity of *Bacillus* YjqC. Catalases may have peroxidase activity when they encounter specific substrates [[15](#), [17](#)]. In this study, SA and SNP evoked peroxidase activity of *B. altitudinis* hb4 YjqC. Generally speaking, enzymes with low  $K_M$  are more efficient than enzymes with high  $K_M$  with low levels of substrates. However, enzymes with low  $K_M$  may more vulnerable to inactivation by high levels of substrate [[17](#)]. The YjqC and CotA of *B. altitudinis* hb4 showed different affinity and catalytic efficiency for SA and SNP. Therefore, they would be complementary for the catalytic oxidation of SA and SNP distributed in a complex system.

### Characterization of Spore YjqC and CotA

Compared to the free YjqC, the spore YjqC exhibited an increased  $K_M$  and a decreased  $V_{\text{max}}$  ([Table 4](#)). The spore YjqC exhibited optimal catalase activity at pH 8.0 and 45°C ([Fig 3A and 3B](#)). In contrast, spore catalase of *B. pumilus* strains SAFR-032 and ATCC 7061 showed optimal activity at 70 and 37°C, respectively [[13](#)]. The spore YjqC also exhibited peroxidase activity toward SA and SNP. The spore YjqC exhibited optimal peroxidase activity toward SA at pH 8.0 and 65°C. The optimal conditions for the spore YjqC toward SNP were pH 8.0 and 70°C. Compared to the free YjqC, the spore YjqC had a lower catalytic efficiency toward SA and

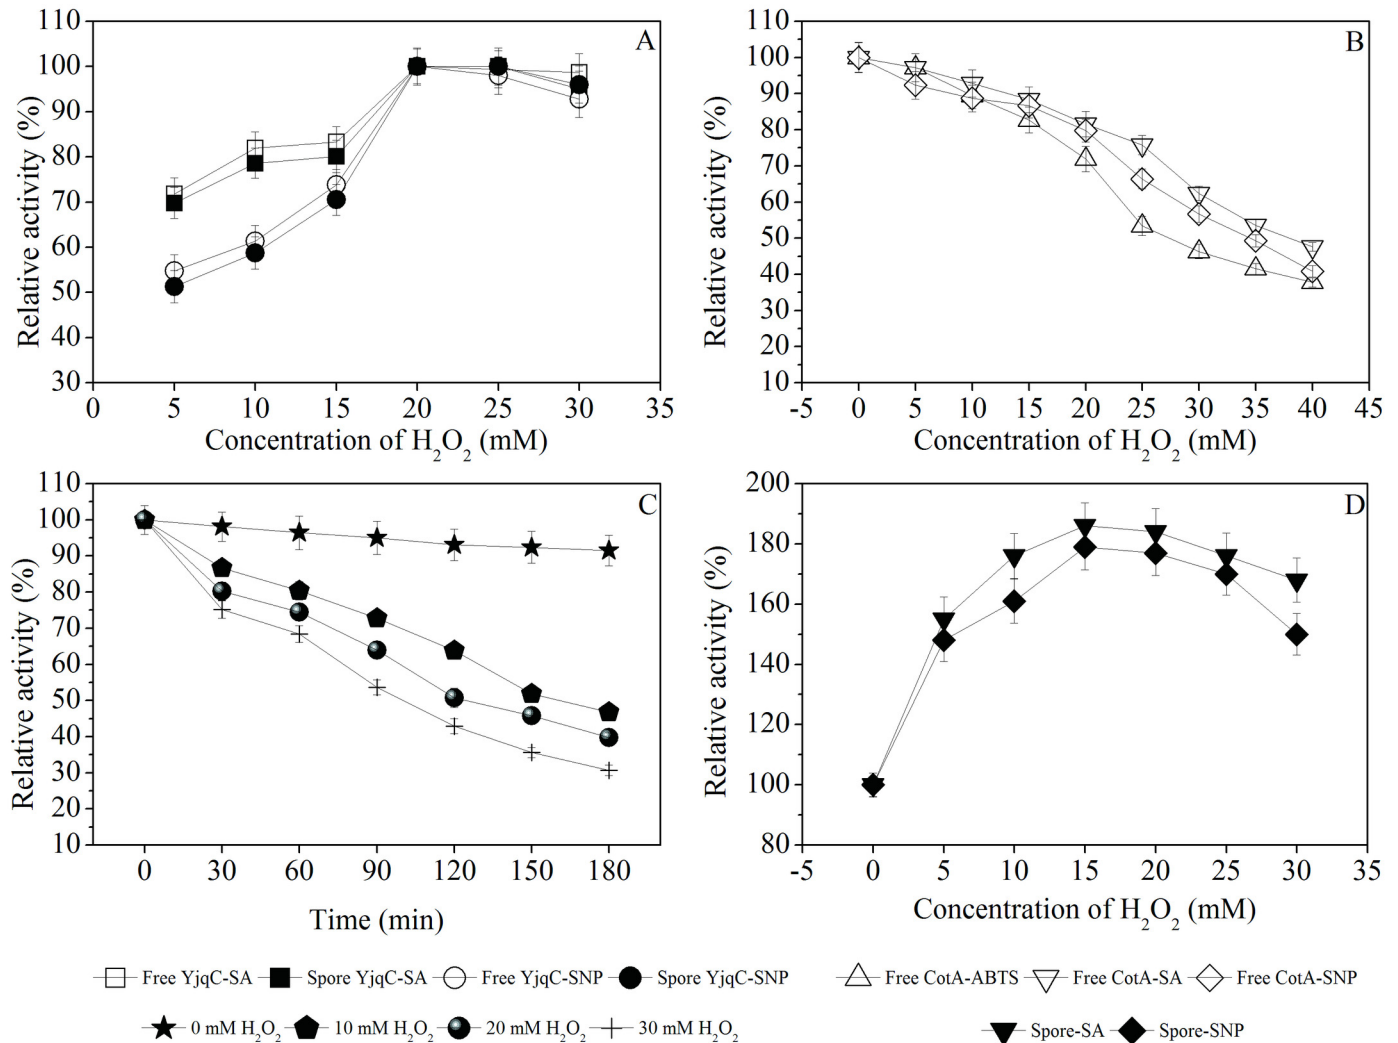

**Fig 5. Effects of H<sub>2</sub>O<sub>2</sub> concentrations on activity of YjqC and CotA from *B. altitudinis* hb4.** (A) Variable H<sub>2</sub>O<sub>2</sub> effects on peroxidase activity from the free and spore YjqC. (B) Inhibition by H<sub>2</sub>O<sub>2</sub> of CotA activity toward ABTS, SA and SNP. (C) Stability of CotA incubated with different concentrations of H<sub>2</sub>O<sub>2</sub> for 0–180 min. (D) Effects of H<sub>2</sub>O<sub>2</sub> concentrations on enzymatic activity of spore enzymes toward SA and SNP.

doi:10.1371/journal.pone.0158351.g005

SNP. Similar to the free YjqC, the spore YjqC exhibited a slightly higher affinity and catalytic efficiency for SA than SNP.

Compared to free CotA, the optimal conditions for the spore CotA toward ABTS shifted to pH 4.5 and 85°C. The optimal pH of the spore CotA toward SA and SNP shifted to 9.0 and 7.0, respectively (Fig 2C). The optimal temperature for the spore CotA toward SA and SNP increased from 65 to 75°C, respectively (Fig 2D). Compared to the free CotA, the spore CotA showed an increased  $K_M$  and a decreased  $V_{max}$  toward ABTS, SA and SNP (Table 4). In a comparative analysis of  $V_{max}/K_M$  values, the spore CotA of *B. altitudinis* hb4 showed a much higher catalytic efficiency toward ABTS than SA and SNP. It exhibited a higher affinity for SNP than SA. Compared with the CotA laccase on *B. subtilis* spores, *B. altitudinis* hb4 spore CotA had a much higher  $K_M$  value and a lower  $V_{max}/K_M$  toward ABTS (Table D in S2 File). Unfortunately, there are few reports about the use of the spore CotA or YjqC for catalyzing the oxidation of SA and SNP for comparison.

The increased  $K_M$  value and decreased catalytic efficiency of the spore YjqC or CotA can largely be attributed to spore coat being an obstacle for substrate diffusion or product emission. This phenomenon has also appeared for the immobilization of enzymes in spores [21]. Although there were disadvantages of spore YjqC or CotA, they had much higher stability than free enzymes under harsh conditions such as alkali pH, heat and high concentrations of chemicals [36]. The free CotA had only approximately 45% of residual activity after 12 h of incubation under the optimal pH and temperature. In contrast, the spore CotA exhibited higher stability under the optimal conditions. The spore CotA retained approximately 70% of its residual activity toward ABTS after an incubation of 12 h (Fig 2E). Similarly, the spore CotA also had better stability than free CotA for catalyzing the oxidation of SA and SNP (Fig 2F). The spore YjqC also exhibited a higher stability than free YjqC. The residual activity of the spore YjqC was 40% higher than the residual activity for free YjqC after an incubation of 12 h under optimal conditions (Fig 3E). The spore also elevated the stability of the YjqC-catalyzed oxidation of SA and SNP under optimal conditions (Fig 3F).

## H<sub>2</sub>O<sub>2</sub> Stability of CotA

As shown in Fig 5B, activity of CotA was inhibited by H<sub>2</sub>O<sub>2</sub>. The IC<sub>50</sub> values of H<sub>2</sub>O<sub>2</sub> against activity of *B. altitudinis* hb4 CotA were calculated to be approximately 27.5, 38 and 35 mM for ABTS, SA and SNP, respectively. CotA of *B. altitudinis* hb4 had a much higher H<sub>2</sub>O<sub>2</sub> tolerance than laccases from *Trametes versicolor* and *Trametes trogii* (Table 5). The activity of the *Trametes trogii* laccase was inhibited by 50% at only 165 μM H<sub>2</sub>O<sub>2</sub>. Compared with the versatile ligninolytic peroxidase of *Pleurotus eryngii*, *B. altitudinis* hb4 CotA had a much longer half-life for catalytic activity (Table 5).

As shown in Fig 5C, the half-life of CotA decreased with increasing H<sub>2</sub>O<sub>2</sub> concentrations. The past study demonstrated that the impaired activity of laccase was attributed to inhibition rather than denaturation by H<sub>2</sub>O<sub>2</sub> [7]. It was initially concluded that the H<sub>2</sub>O<sub>2</sub> stability of *B. altitudinis* hb4 CotA was much higher than the stability of laccase and peroxidase from fungi. The striking H<sub>2</sub>O<sub>2</sub> stability of *B. altitudinis* hb4 CotA might be the common properties of CotA laccases from the *B. pumilus* group. This similarity would be beneficial for developing biotechnological applications for CotA.

A certain concentration of H<sub>2</sub>O<sub>2</sub> was indispensable for the YjqC-catalyzed oxidation of SA and SNP. However, high concentrations of H<sub>2</sub>O<sub>2</sub> had an inhibitory effect on the laccase activity of CotA [6]. At 20 mM H<sub>2</sub>O<sub>2</sub>, the free CotA showed approximately 82 and 80% of relative activity toward SA and SNP, respectively (Fig 5B). Previous studies have demonstrated that spore maturation leads to a minor improvement in the enzymatic properties of CotA, such as resistance to proteinase digestion [22]. Therefore, spores might relieve inhibition of H<sub>2</sub>O<sub>2</sub> to CotA. The effects of H<sub>2</sub>O<sub>2</sub> on the spore-catalyzed oxidation of SA and SNP were also determined and compared (Fig 5D). Without the effects of H<sub>2</sub>O<sub>2</sub>, the activity of spores oxidizing SA and SNP was denoted as 100%. The spores showed increased catalytic activity toward SA and SNP with increases in H<sub>2</sub>O<sub>2</sub>. At 15 mM H<sub>2</sub>O<sub>2</sub>, the spores exhibited maximum activity toward SA (186%) and SNP (179%), respectively. Therefore, the combination of *B. altitudinis* hb4 spores and 15 mM H<sub>2</sub>O<sub>2</sub> was powerful for the oxidation of SA and SNP.

## Spore-Catalyzed Degradation of SA and SNP in RSM

As shown in Fig 6A and 6B, there was less SA and SNP extracted from the RSM treated with the spore suspension. Approximately 1.15 mg/g of SA was extracted from the RSM with no treatment. In contrast, only 0.59 mg/g of SA was extracted from the RSM treated with the spore suspension for 18 h. The amount of SA extracted decreased to 0.53 mg/g when RSM was

**Table 5. Effects of H<sub>2</sub>O<sub>2</sub> on activity of laccase and peroxidase toward ABTS.**

| Enzyme          | Strain                     | IC50 of H <sub>2</sub> O <sub>2</sub> against activity | Catalytic stability half-life (min) | Reference  |
|-----------------|----------------------------|--------------------------------------------------------|-------------------------------------|------------|
| Laccase         | <i>Trametes versicolor</i> | 10 mM                                                  | ND <sup>a</sup>                     | [6, 8, 45] |
| Laccase         | <i>Trametes troglia</i>    | 165 μM                                                 | ND                                  | [7]        |
| VP <sup>b</sup> | <i>Pleurotus eryngii</i>   | ND                                                     | 4.1 <sup>c</sup>                    | [3]        |
| CotA            | <i>B. altitudinis</i> hb4  | 27.5 mM                                                | 100–160 <sup>d</sup>                | This study |

<sup>a</sup> No data provided

<sup>b</sup> Versatile ligninolytic peroxidase

<sup>c</sup> Incubation of enzyme with 1 mM H<sub>2</sub>O<sub>2</sub>

<sup>d</sup> Incubation of enzyme with 10, 20 and 30 mM H<sub>2</sub>O<sub>2</sub>

doi:10.1371/journal.pone.0158351.t005

treated with the spore suspension plus 15 mM H<sub>2</sub>O<sub>2</sub>. The content of SA was not reduced by the sole use of 15 mM H<sub>2</sub>O<sub>2</sub> for treating RSM. Similar changes were also observed in the amount of SNP extracted from RSM (Fig 6B). Without any treatment, approximately 0.65 mg/g of SNP was extracted from RSM. Following treatment of RSM with the spore suspension, the amount of SNP decreased to 0.47 mg/g. The amount of SNP further decreased to 0.37 mg/g with the addition of 15 mM H<sub>2</sub>O<sub>2</sub> to the spore suspension. Compared with the controls, a similar amount of SNP was extracted from the RSM treated with H<sub>2</sub>O<sub>2</sub>. In conclusion, the SA and SNP content decreased by 46 and 25% after treating RSM with the spore suspension for 18 h. The SA and SNP content decreased approximately 51 and 41% after RSM was treated with the spore suspension plus 15 mM H<sub>2</sub>O<sub>2</sub>. These results demonstrated that the spores were efficient

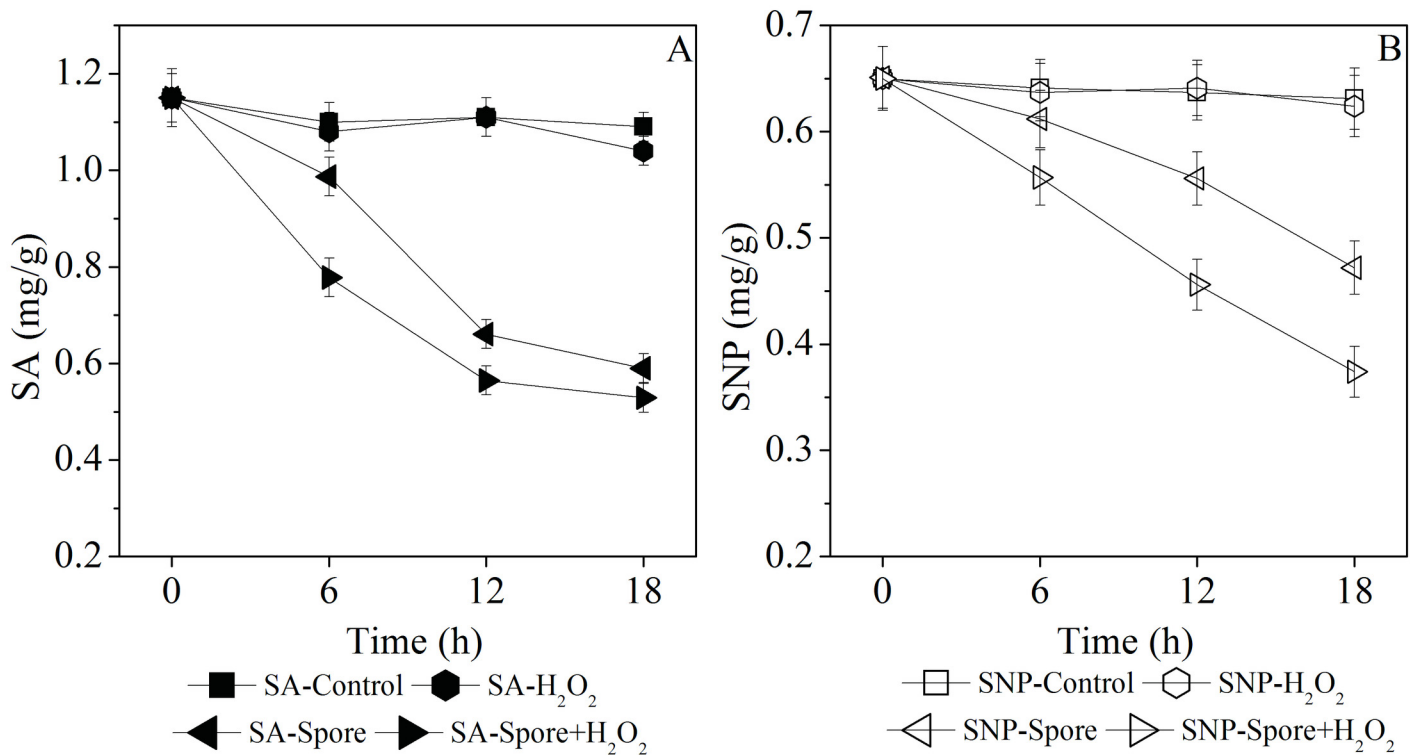

**Fig 6.** (A) Contents of SA extracted from RSM treated with 15 mM H<sub>2</sub>O<sub>2</sub> and/or spores for 18 h. (B) Contents of SNP extracted from RSM treated with 15 mM H<sub>2</sub>O<sub>2</sub> and/or spores for 18 h.

doi:10.1371/journal.pone.0158351.g006



in the catalytic degradation of SA and SNP in RSM. Moreover, this spore-catalyzed degradation could be improved by adding H<sub>2</sub>O<sub>2</sub>. The spore-catalyzed degradation of SNP was increased by 64% with 15 mM H<sub>2</sub>O<sub>2</sub>. The elevated efficiency might have occurred due to the activation of peroxidase activity from the spore YjqC.

As mentioned previously, the spores could be regarded as an inherent multi-enzyme biocatalyst comprising YjqC and CotA. Numerous studies have demonstrated that a multi-enzyme biocatalyst is more promising for the degradation of phenolic compounds in biomass [46]. Moreover, the spores have a much higher H<sub>2</sub>O<sub>2</sub> stability than free YjqC and CotA. The spores are also beneficial for enzyme purification and immobilization processes. The industrial-scale production of spores can also be more easily implemented. Thus, there is great potential for utilizing spores as biocatalyst in catalyzing the degradation of SA and SNP in RSM. Due to the relative ubiquity of YjqC and CotA in *Bacillus* species, the utilization of *B. altitudinis* hb4 spores for treating RSM could provide an ideal experience for other *Bacillus* strains, especially microbial feed additives such as *B. pumilus* and *B. subtilis*.

## Supporting Information

**S1 File. Supporting data for Figs A-D.** Fig. A Neighbor-joining tree exhibiting the phylogenetic relationship of *B. altitudinis* SYBC hb4 CotA and YjqC to homologous proteins from other *Bacillus* strains. Fig. B (a) The standard curve exhibited a good linear relationship between peak area and concentration of standard SNP. (b) HPLC-DAD chromatograms of standard SNP. Fig. C (a) The standard curve exhibited a good linear relationship between peak area and concentration of standard SA. (b) HPLC-DAD chromatograms of standard SA. Fig. D HPLC-DAD chromatograms of a mixture of standard SA and standard SNP. (DOC)

**S2 File. Supporting data for Tables A-D.** Table A. Kinetic properties of purified laccase from *Bacillus* species toward ABTS. Table B. Kinetic properties of Mn catalase or peroxidase. Table C. Kinetic properties of purified laccase toward SA. Table D. Kinetic properties of spore laccase toward ABTS. (DOC)

## Acknowledgments

This work was supported by the Fundamental Research Fund for the Central Universities. The research was funded by Collaborative Innovation Involving Production, Teaching & Research funds of Jiangsu Province (BY2014023-28) and Agricultural Support Project, Wuxi Science & Technology Development (CLE01N1310). This work was also financially supported by the Program of Marine Biological Resources Exploitation and Utilization of Science and Technology Innovation Team of Taizhou (No.1302ky08).

## Author Contributions

Conceived and designed the experiments: YZ. Performed the experiments: YZ X. Li ZH. Analyzed the data: YZ X. Liao. Contributed reagents/materials/analysis tools: RX YC. Wrote the paper: YZ.

## References

1. Rao MA, Scelza R, Acevedo F, Diez MC, Gianfreda L. Enzymes as useful tools for environmental purposes. *Chemosphere*. 2014; 107:145–62. doi: [10.1016/j.chemosphere.2013.12.059](https://doi.org/10.1016/j.chemosphere.2013.12.059) PMID: [24411841](https://pubmed.ncbi.nlm.nih.gov/24411841/)

2. Forootanfar H, Faramarzi MA. Insights into laccase producing organisms, fermentation states, purification strategies, and biotechnological applications. *Biotechnol Progr*. 2015; 31:1443–63.
3. Bao X, Huang XN, Lu XF, Li JJ. Improvement of hydrogen peroxide stability of *Pleurotus eryngii* versatile ligninolytic peroxidase by rational protein engineering. *Enzyme Microb Technol*. 2014; 54:51–8. doi: [10.1016/j.enzmictec.2013.10.003](https://doi.org/10.1016/j.enzmictec.2013.10.003) PMID: [24267568](https://pubmed.ncbi.nlm.nih.gov/24267568/)
4. Crestini C, Melone F, Saladino R. Novel multienzyme oxidative biocatalyst for lignin bioprocessing. *Bioorg Med Chem*. 2011; 19(16):5071–8. WOS:000293503000040. doi: [10.1016/j.bmc.2011.05.058](https://doi.org/10.1016/j.bmc.2011.05.058) PMID: [21764591](https://pubmed.ncbi.nlm.nih.gov/21764591/)
5. Touahar IE, Haroune Ls, Ba S, Bellenger J-P, Cabana H. Characterization of combined cross-linked enzyme aggregates from laccase, versatile peroxidase and glucose oxidase, and their utilization for the elimination of pharmaceuticals. *Sci Total Environ*. 2014; 481:90–9. doi: [10.1016/j.scitotenv.2014.01.132](https://doi.org/10.1016/j.scitotenv.2014.01.132) PMID: [24589758](https://pubmed.ncbi.nlm.nih.gov/24589758/)
6. Milton RD, Minter SD. Investigating the reversible inhibition model of laccase by hydrogen peroxide for bioelectrocatalytic applications. *J Electrochem Soc*. 2014; 161(13):H3011–H4. WOS:000345972200004.
7. Scodeller P, Carballo R, Szamocki R, Levin L, Forchiassin F, Calvo EJ. Layer-by-layer self-assembled osmium polymer-mediated laccase oxygen cathodes for biofuel cells: the role of hydrogen peroxide. *J Am Chem Soc*. 2010; 132(32):11132–40. WOS:000280861300043. doi: [10.1021/ja1020487](https://doi.org/10.1021/ja1020487) PMID: [20698679](https://pubmed.ncbi.nlm.nih.gov/20698679/)
8. Milton RD, Giroud F, Thumser AE, Minter SD, Slade RCT. Hydrogen peroxide produced by glucose oxidase affects the performance of laccase cathodes in glucose/oxygen fuel cells: FAD-dependent glucose dehydrogenase as a replacement. *Phys Chem Chem Phys*. 2013; 15(44):19371–9. WOS:000326220000033. doi: [10.1039/c3cp53351d](https://doi.org/10.1039/c3cp53351d) PMID: [24121716](https://pubmed.ncbi.nlm.nih.gov/24121716/)
9. Martins LO, Durao P, Brissos V, Lindley PF. Laccases of prokaryotic origin: enzymes at the interface of protein science and protein technology. *Cell Mol Life Sci*. 2015; 72(5):911–22. WOS:000349598300006. doi: [10.1007/s00018-014-1822-x](https://doi.org/10.1007/s00018-014-1822-x) PMID: [25572294](https://pubmed.ncbi.nlm.nih.gov/25572294/)
10. Brander S, Mikkelsen JD, Kepp KP. Characterization of an alkali- and halide-resistant laccase expressed in *E-coli*: CotA from *Bacillus clausii*. *PLoS ONE*. 2014; 9(6):e99402. WOS:000340947700098. doi: [10.1371/journal.pone.0099402](https://doi.org/10.1371/journal.pone.0099402) PMID: [24915287](https://pubmed.ncbi.nlm.nih.gov/24915287/)
11. Chen B, Xu W-Q, Pan X-R, Lu L. A novel non-blue laccase from *Bacillus amyloliquefaciens*: secretory expression and characterization. *Int J Biol Macromol*. 2015; 76:39–44. doi: [10.1016/j.ijbiomac.2015.02.019](https://doi.org/10.1016/j.ijbiomac.2015.02.019) PMID: [25709013](https://pubmed.ncbi.nlm.nih.gov/25709013/)
12. Fan LL, Zhao M, Wang Y. Expression of CotA laccase in *Pichia pastoris* and its electrocatalytic sensing application for hydrogen peroxide. *Appl Microbiol Biotechnol*. 2015; 99(22):9483–93. WOS:000363951800014. doi: [10.1007/s00253-015-6720-0](https://doi.org/10.1007/s00253-015-6720-0) PMID: [26062535](https://pubmed.ncbi.nlm.nih.gov/26062535/)
13. Checinska A, Burbank M, Paszczynski AJ. Protection of *Bacillus pumilus* spores by catalases. *Appl Environ Microbiol*. 2012; 78(18):6413–22. WOS:000308336400003. doi: [10.1128/AEM.01211-12](https://doi.org/10.1128/AEM.01211-12) PMID: [22752169](https://pubmed.ncbi.nlm.nih.gov/22752169/)
14. Amo T, Atomi H, Imanaka T. Unique presence of a manganese catalase in a *Hyperthermophilic Archaeon*, *Pyrobaculum calidifontis* VA1. *J Bacteriol*. 2002; 184(12):3305–12. PMID: [12029047](https://pubmed.ncbi.nlm.nih.gov/12029047/)
15. Whittaker JW. Non-heme manganese catalase—the ‘other’ catalase. *Arch Biochem Biophys*. 2012; 525(2):111–20. doi: [10.1016/j.abb.2011.12.008](https://doi.org/10.1016/j.abb.2011.12.008) PMID: [22198285](https://pubmed.ncbi.nlm.nih.gov/22198285/)
16. Loncar N, Fraaije M. Not so monofunctional—a case of thermostable *Thermobifida fusca* catalase with peroxidase activity. *Appl Microbiol Biotechnol*. 2015; 99(5):2225–32. doi: [10.1007/s00253-014-6060-5](https://doi.org/10.1007/s00253-014-6060-5) PMID: [25227535](https://pubmed.ncbi.nlm.nih.gov/25227535/)
17. Loncar N, Fraaije M. Catalases as biocatalysts in technical applications: current state and perspectives. *Appl Microbiol Biotechnol*. 2015; 99(8):3351–7. doi: [10.1007/s00253-015-6512-6](https://doi.org/10.1007/s00253-015-6512-6) PMID: [25761626](https://pubmed.ncbi.nlm.nih.gov/25761626/)
18. Hullo M-F, Moszer I, Danchin A, Martin-Verstraete I. CotA of *Bacillus subtilis* is a copper-dependent laccase. *J Bacteriol*. 2001; 183(18):5426–30. PMID: [11514528](https://pubmed.ncbi.nlm.nih.gov/11514528/)
19. Zhang C, Diao H, Lu F, Bie X, Wang Y, Lu Z. Degradation of triphenylmethane dyes using a temperature and pH stable spore laccase from a novel strain of *Bacillus vallismortis*. *Bioresour Technol*. 2012; 126:80–6. doi: [10.1016/j.biortech.2012.09.055](https://doi.org/10.1016/j.biortech.2012.09.055) PMID: [23073092](https://pubmed.ncbi.nlm.nih.gov/23073092/)
20. Lu L, Zhao M, Wang T-N, Zhao L-Y, Du M-H, Li T-L, et al. Characterization and dye decolorization ability of an alkaline resistant and organic solvents tolerant laccase from *Bacillus licheniformis* LS04. *Bioresour Technol*. 2012; 115:35–40. doi: [10.1016/j.biortech.2011.07.111](https://doi.org/10.1016/j.biortech.2011.07.111) PMID: [21868217](https://pubmed.ncbi.nlm.nih.gov/21868217/)
21. Gashtasbi F, Ahmadian G, Noghabi KA. New insights into the effectiveness of alpha-amylase enzyme presentation on the *Bacillus subtilis* spore surface by adsorption and covalent immobilization. *Enzyme Microb Technol*. 2014; 64:17–23. doi: [10.1016/j.enzmictec.2014.05.006](https://doi.org/10.1016/j.enzmictec.2014.05.006) PMID: [25152412](https://pubmed.ncbi.nlm.nih.gov/25152412/)

22. Knecht L, Pasini P, Daunert S. Bacterial spores as platforms for bioanalytical and biomedical applications. *Anal Bioanal Chem*. 2011; 400(4):977–89. doi: [10.1007/s00216-011-4835-4](https://doi.org/10.1007/s00216-011-4835-4) PMID: [21380604](https://pubmed.ncbi.nlm.nih.gov/21380604/)
23. Abhyankar W, Beek AT, Dekker H, Kort R, Brul S, de Koster CG. Gel-free proteomic identification of the *Bacillus subtilis* insoluble spore coat protein fraction. *Proteomics*. 2011; 11(23):4541–50. doi: [10.1002/pmic.201100003](https://doi.org/10.1002/pmic.201100003) PMID: [21905219](https://pubmed.ncbi.nlm.nih.gov/21905219/)
24. Tan IS, Ramamurthi KS. Spore formation in *Bacillus subtilis*. *Environ Microbiol Rep*. 2014; 6(3):212–25. doi: [10.1111/1758-2229.12130](https://doi.org/10.1111/1758-2229.12130) PMID: [24983526](https://pubmed.ncbi.nlm.nih.gov/24983526/)
25. Zhang C, Diao HW, Lu FX, Bie XM, Wang YF, Lu ZX. Degradation of triphenylmethane dyes using a temperature and pH stable spore laccase from a novel strain of *Bacillus vallismortis*. *Bioresour Technol*. 2012; 126:80–6. WOS:000313997500012. doi: [10.1016/j.biortech.2012.09.055](https://doi.org/10.1016/j.biortech.2012.09.055) PMID: [23073092](https://pubmed.ncbi.nlm.nih.gov/23073092/)
26. Niwa T, Doi U, Kato Y, Osawa T. Inhibitory mechanism of sinapinic acid against peroxyxynitrite-mediated tyrosine nitration of protein in vitro. *FEBS Lett*. 1999; 459(1):43–6. [http://dx.doi.org/10.1016/S0014-5793\(99\)01216-8](http://dx.doi.org/10.1016/S0014-5793(99)01216-8). PMID: [10508914](https://pubmed.ncbi.nlm.nih.gov/10508914/)
27. Koschorreck K, Richter S, Ene A, Roduner E, Schmid R, Urlacher V. Cloning and characterization of a new laccase from *Bacillus licheniformis* catalyzing dimerization of phenolic acids. *Appl Microbiol Biotechnol*. 2008; 79(2):217–24. doi: [10.1007/s00253-008-1417-2](https://doi.org/10.1007/s00253-008-1417-2) PMID: [18330561](https://pubmed.ncbi.nlm.nih.gov/18330561/)
28. Xie T, Liu Z, Liu Q, Wang G. Structural insight into the oxidation of sinapic acid by CotA laccase. *J Struct Biol*. 2015; 190(2):155–61. doi: [10.1016/j.jsb.2015.03.005](https://doi.org/10.1016/j.jsb.2015.03.005) PMID: [25799944](https://pubmed.ncbi.nlm.nih.gov/25799944/)
29. Lu D, Zhang Y, Niu S, Wang L, Lin S, Wang C, et al. Study of phenol biodegradation using *Bacillus amyloliquefaciens* strain WJDB-1 immobilized in alginate-chitosan-alginate (ACA) microcapsules by electrochemical method. *Biodegradation*. 2012; 23(2):209–19. doi: [10.1007/s10532-011-9500-2](https://doi.org/10.1007/s10532-011-9500-2) PMID: [21809019](https://pubmed.ncbi.nlm.nih.gov/21809019/)
30. Chagas PMB, Torres JA, Silva MC, Correa AD. Immobilized soybean hull peroxidase for the oxidation of phenolic compounds in coffee processing wastewater. *Int J Biol Macromol*. 2015; 81:568–75. doi: [10.1016/j.ijbiomac.2015.08.061](https://doi.org/10.1016/j.ijbiomac.2015.08.061) PMID: [26321426](https://pubmed.ncbi.nlm.nih.gov/26321426/)
31. Yadav S, Chandra R. Syntrophic co-culture of *Bacillus subtilis* and *Klebsiella pneumoniae* for degradation of kraft lignin discharged from rayon grade pulp industry. *J Environ Sci-China*. 2015; 33:229–38. WOS:000358976000026. doi: [10.1016/j.jes.2015.01.018](https://doi.org/10.1016/j.jes.2015.01.018) PMID: [26141897](https://pubmed.ncbi.nlm.nih.gov/26141897/)
32. Zhang Y, Luan H, Wei Z, Hao Z, Xi R, Liao X. Exploiting of honey-associated *Bacillus* strains as plant-growth promoting bacteria for enhancing barley growth in rare earth tailings. *Ann Microbiol*. 2015; 66:559–68. doi: [10.1007/s13213-015-1135-9](https://doi.org/10.1007/s13213-015-1135-9)
33. Zhang Y, Li X, Xi R, Guan Z, Cai Y, Liao X. Characterization of an acid-stable catalase KatB isolated from *Bacillus altitudinis* SYBC hb4. *Ann Microbiol*. 2015; 66:131–41. doi: [10.1007/s13213-015-1089-y](https://doi.org/10.1007/s13213-015-1089-y)
34. Nguyen Thi Minh H, Durand A, Loison P, Perrier-Cornet J-M, Gervais P. Effect of sporulation conditions on the resistance of *Bacillus subtilis* spores to heat and high pressure. *Appl Microbiol Biotechnol*. 2011; 90(4):1409–17. doi: [10.1007/s00253-011-3183-9](https://doi.org/10.1007/s00253-011-3183-9) PMID: [21380515](https://pubmed.ncbi.nlm.nih.gov/21380515/)
35. Gunne M, Al-Sultani D, Urlacher VB. Enhancement of copper content and specific activity of CotA laccase from *Bacillus licheniformis* by coexpression with CopZ copper chaperone in *E. coli*. *J Bacteriol*. 2013; 168(3):252–5.
36. Zhang C, Zhang S, Diao H, Zhao H, Zhu X, Lu F, et al. Purification and characterization of a temperature- and pH-stable laccase from the spores of *Bacillus vallismortis* fmb-103 and its application in the degradation of malachite green. *J Agric Food Chem*. 2013; 61(23):5468–73. doi: [10.1021/jf4010498](https://doi.org/10.1021/jf4010498) PMID: [23706133](https://pubmed.ncbi.nlm.nih.gov/23706133/)
37. Liu H, Bergman NH, Thomason B, Shallom S, Hazen A, Crossno J, et al. Formation and composition of the *Bacillus anthracis* endospore. *J Bacteriol*. 2004; 186(1):164–78. PMID: [14679236](https://pubmed.ncbi.nlm.nih.gov/14679236/); PubMed Central PMCID: [PMC303457](https://pubmed.ncbi.nlm.nih.gov/PMC303457/).
38. Smyk B. Spectral properties of sinapine in water environment. *J Mol Liq*. 2015; 208:1–4. <http://dx.doi.org/10.1016/j.molliq.2015.03.058>.
39. Niu Y, Jiang M, Guo M, Wan C, Hu S, Jin H, et al. Characterization of the factors that influence sinapine concentration in rapeseed meal during fermentation. *PLoS ONE*. 2014; 10(1):e0116470.
40. Khattab R, Eskin MA, Thiyam-Hollander U. Production of canolol from canola meal phenolics via hydrolysis and microwave-induced decarboxylation. *J Am Oil Chem Soc*. 2014; 91(1):89–97. doi: [10.1007/s11746-013-2345-6](https://doi.org/10.1007/s11746-013-2345-6)
41. Handtke S, Schroeter R, Jurgen B, Methling K, Schluter R, Albrecht D, et al. *Bacillus pumilus* reveals a remarkably high resistance to hydrogen peroxide provoked oxidative stress. *PLoS ONE*. 2014; 9(1). WOS:000330240500061.
42. Reiss R, Ihssen J, Thony-Meyer L. *Bacillus pumilus* laccase: a heat stable enzyme with a wide substrate spectrum. *Bmc Biotechnology*. 2011; 11:9. WOS:000287475500001. doi: [10.1186/1472-6750-11-9](https://doi.org/10.1186/1472-6750-11-9) PMID: [21266052](https://pubmed.ncbi.nlm.nih.gov/21266052/)

43. Liu Y, Lai QL, Du J, Shao ZZ. Reclassification of *Bacillus invictae* as a later heterotypic synonym of *Bacillus altitudinis*. *Int J Syst Evol Micr*. 2015; 65:2769–73. WOS:000362384800064.
44. Nićiforović N, Abramovič H. Sinapic acid and its derivatives: natural sources and bioactivity. *Compr Rev Food Sci Food Saf*. 2014; 13(1):1541–4337.
45. Milton RD, Giroud F, Thumser AE, Minter SD, Slade RCT. Bilirubin oxidase bioelectrocatalytic cathodes: the impact of hydrogen peroxide. *Chem Commun*. 2014; 50(1):94–6. WOS:000327606000022.
46. Prasetyo EN, Rodríguez RD, Lukesch B, Weiss S, Murkovic M, Katsoyannos E, et al. Laccase-cellobiose dehydrogenase-catalyzed detoxification of phenolic-rich olive processing residues. *Int J Environ Sci Tech*. 2015; 12(4):1343–52.
